# Supplementary material for: Household Composition and Inequalities in COVID-19 Vaccination in Wales, UK
Source: MDPI journal article supplement (doi:10.3390/vaccines11030604), 2023-03-07
Supplement: s1 [file s1]

**Supplementary Table S1.** Multivariate regression model estimates for vaccination with two doses of COVID-19 vaccine (any type), not including household type as a variable, Wales.<sup>a,b</sup>

| Variable                | Category       | Population (n) | Vaccinated (n) | aOR (95% CI)     |
|-------------------------|----------------|----------------|----------------|------------------|
| Gender                  | Female         | 1,161,191      | 1,016,737      | *                |
|                         | Male           | 1,156,084      | 957,409        | 0.73 (0.73-0.74) |
| Age Group               | 18-29          | 402,223        | 298,465        | 0.28 (0.28-0.28) |
|                         | 30-49          | 731,813        | 575,472        | 0.37 (0.37-0.37) |
|                         | 50-69          | 760,289        | 694,063        | *                |
|                         | 70+            | 422,950        | 406,146        | 2.05 (2.01-2.09) |
| Health Board            | Health Board 1 | 438,803        | 380,953        | *                |
|                         | Health Board 2 | 502,623        | 427,760        | 0.71 (0.70-0.72) |
|                         | Health Board 3 | 369,837        | 303,933        | 0.83 (0.82-0.84) |
|                         | Health Board 4 | 336,450        | 294,497        | 1.04 (1.03-1.06) |
|                         | Health Board 5 | 281,646        | 241,400        | 0.72 (0.71-0.73) |
|                         | Health Board 6 | 94,642         | 81,317         | 0.66 (0.65-0.68) |
|                         | Health Board 7 | 293,274        | 244,286        | 0.73 (0.72-0.74) |
| Location Classification | Rural          | 712,806        | 626,082        | 1.16 (1.15-1.17) |
|                         | Urban          | 1,604,469      | 1,348,064      | *                |
| Ethnicity               | Asian          | 44,767         | 34,775         | 0.66 (0.64-0.67) |
|                         | Black          | 11,773         | 7,475          | 0.35 (0.33-0.36) |
|                         | Mixed          | 31,523         | 21,598         | 0.44 (0.43-0.46) |
|                         | Other          | 10,432         | 6,740          | 0.36 (0.35-0.38) |
|                         | Unknown        | 235,552        | 158,880        | 0.31 (0.31-0.31) |
|                         | White          | 1,983,228      | 1,744,678      | *                |
| Deprivation Quintile    | 1              | 452,962        | 356,673        | 0.45 (0.45-0.46) |
|                         | 2              | 461,071        | 386,911        | 0.59 (0.58-0.59) |
|                         | 3              | 468,108        | 397,891        | 0.66 (0.65-0.67) |
|                         | 4              | 465,345        | 409,365        | 0.79 (0.78-0.80) |
|                         | 5              | 469,789        | 423,306        | *                |

<sup>a</sup>Data from the Wales Immunisation System as at 1st January 2022.

<sup>b</sup> Deprivation quintile was calculated using Lower-layer Super Output Areas of residence, ranked according to the Welsh Index of Multiple Deprivation.

**Supplementary Table S2.** Study population by household type, number of people stratified for sex, age group and Asian, Black, Mixed and Other ethnic group categories, Wales 2020-21.

| Stratification | Household Type |         |         |         |        |         |       |        |
|----------------|----------------|---------|---------|---------|--------|---------|-------|--------|
|                | 1              | 2       | 3       | 4       | 5      | 6       | 7     | 8      |
| None (all)     | 327,629        | 639,882 | 549,758 | 135,043 | 48,892 | 577,057 | 6,553 | 32,461 |
| Male           | 152,625        | 322,776 | 241,270 | 69,221  | 27,866 | 319,466 | 3,682 | 19,178 |
| Female         | 175,004        | 317,106 | 308,488 | 65,822  | 21,026 | 257,591 | 2,871 | 13,283 |
| 18-29          | 22,772         | 51,272  | 103,767 | 37,639  | 16,660 | 154,561 | 4,492 | 11,060 |
| 30-49          | 63,964         | 103,864 | 343,382 | 66,208  | 16,295 | 127,686 | 1,589 | 8,825  |
| 50-69          | 112,016        | 271,654 | 93,893  | 25,609  | 12,158 | 235,672 | 214   | 9,073  |
| 70+            | 128,877        | 213,092 | 8,716   | 5,587   | 3,779  | 59,138  | 258   | 3,503  |
| Asian          | 2,417          | 5,414   | 13,476  | 9,764   | 1,731  | 9,488   | 482   | 1,995  |
| Black          | 1,206          | 1,613   | 3,302   | 2,269   | 541    | 2,085   | 165   | 592    |
| Mixed          | 3,470          | 5,190   | 10,077  | 3,893   | 986    | 6,930   | 180   | 797    |
| Other          | 807            | 1,404   | 3,108   | 2,191   | 533    | 1,876   | 114   | 399    |

**Supplementary Table S3.** Study population by household type, percentage of people stratified for sex, age group and Asian, Black, Mixed and Other ethnic group categories, Wales 2020-21.

| Stratification | Household Type |       |       |       |      |       |      |      |
|----------------|----------------|-------|-------|-------|------|-------|------|------|
|                | 1              | 2     | 3     | 4     | 5    | 6     | 7    | 8    |
| None (all)     | 14.1%          | 27.6% | 23.7% | 5.8%  | 2.1% | 24.9% | 0.3% | 1.4% |
| Male           | 13.2%          | 27.9% | 20.9% | 6.0%  | 2.4% | 27.6% | 0.3% | 1.7% |
| Female         | 15.1%          | 27.3% | 26.6% | 5.7%  | 1.8% | 22.2% | 0.2% | 1.1% |
| 18-29          | 5.7%           | 12.7% | 25.8% | 9.4%  | 4.1% | 38.4% | 1.1% | 2.7% |
| 30-49          | 8.7%           | 14.2% | 46.9% | 9.0%  | 2.2% | 17.4% | 0.2% | 1.2% |
| 50-69          | 14.7%          | 35.7% | 12.3% | 3.4%  | 1.6% | 31.0% | 0.0% | 1.2% |
| 70+            | 30.5%          | 50.4% | 2.1%  | 1.3%  | 0.9% | 14.0% | 0.1% | 0.8% |
| Asian          | 5.4%           | 12.1% | 30.1% | 21.8% | 3.9% | 21.2% | 1.1% | 4.5% |
| Black          | 10.2%          | 13.7% | 28.0% | 19.3% | 4.6% | 17.7% | 1.4% | 5.0% |
| Mixed          | 11.0%          | 16.5% | 32.0% | 12.3% | 3.1% | 22.0% | 0.6% | 2.5% |
| Other          | 7.7%           | 13.5% | 29.8% | 21.0% | 5.1% | 18.0% | 1.1% | 3.8% |
